# Supplementary material for: Method to Determine the Optimal Aptamer-to-Bead Ratio by Using Flow Cytometry
Source: Hindawi journal article supplement (doi:10.1155/2023/5842652), 2023-07-11
Supplement: f1 [file 5842652.f1.zip]

**Figure S1. Verification of aptamers binding capacity at each Aptamer/bead ratio via ICP/OES analysis**

**(a) RNA N1 2174**

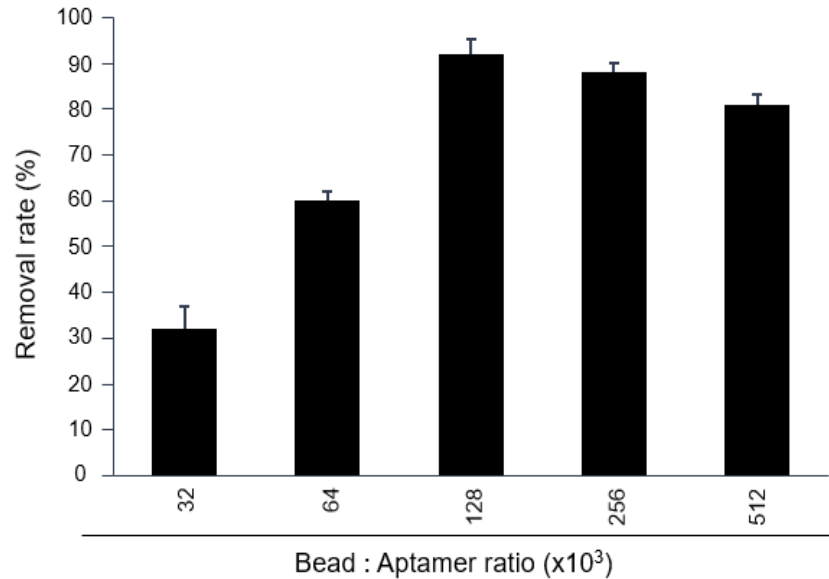

**(b) DNA FA-N3**

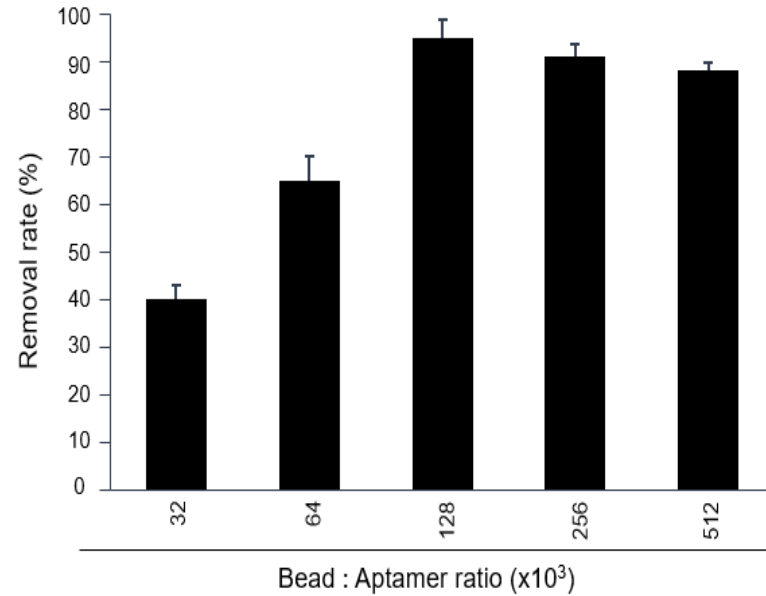

**(c) DNA FA-M3**

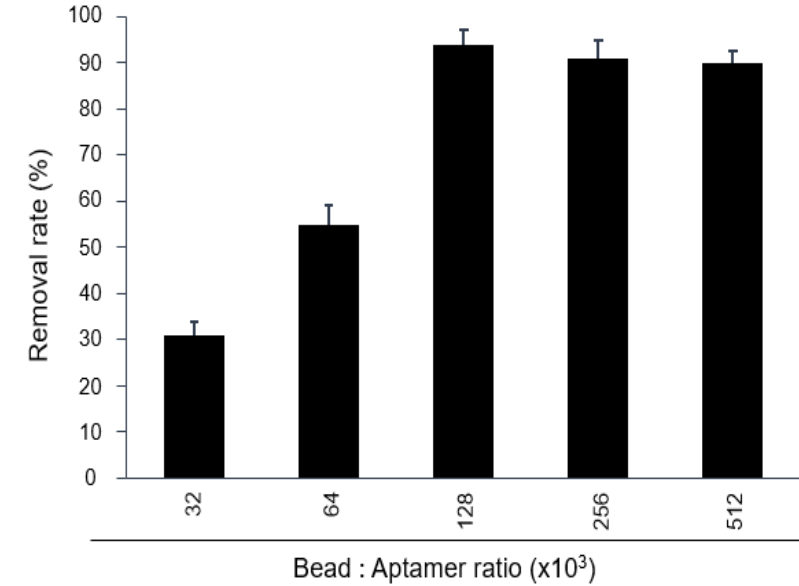

**Figure S. Verification of aptamers binding capacity.** (a) Verification of N1 2174 aptamer  $\text{Ni}^{2+}$  binding capacity at each aptamer-to-bead ratio by ICP/OES analysis. (b) Verification of FA-N3 aptamer  $\text{Ni}^{2+}$  binding capacity at each aptamer-to-bead ratio by ICP/OES analysis. (c) Verification of FA-M3 aptamer  $\text{Mn}^{2+}$  binding capacity at each aptamer-to-bead ratio by ICP/OES analysis. The concentration of ions was measured by ICP/OES after exposure to the indicated aptamer–bead complex. All experiments were repeated three times. The removal rate is expressed as a percentage (passing through/initial ion concentration).
